# Supplementary material for: Photocatalytic CO2 reduction of C/ZnO nanofibers enhanced by an Ni-NiS cocatalyst
Source: Royal Society of Chemistry journal article supplement (doi:10.1039/c9nr10451h), 2020-01-01
Supplement: c9nr10451h1.pdf [file c9nr10451h1.pdf]

**Supplemental Materials for**  
**Photocatalytic CO<sub>2</sub> Reduction of C/ZnO nanofibers enhanced by Ni-NiS cocatalyst**

Hongzhao Deng,<sup>a</sup> Feiyan Xu,<sup>a</sup> Bei Cheng,<sup>a</sup> Jiaguo Yu<sup>\*,a,b</sup> and Wingkei Ho<sup>\*,c</sup>

<sup>a</sup>State Key Laboratory of Advanced Technology for Materials Synthesis and Processing, Wuhan University of Technology, Wuhan 430070, China. E-mail: jiaguoyu@yahoo.com Tel: +86-27-87871029, Fax: +86-27-87879468. Email: jiaguoyu@yahoo.com

<sup>b</sup>School of Materials Science and Engineering, Zhengzhou University, Zhengzhou 450001, China.

<sup>c</sup>Department of Science and Environmental Studies, The Education University of Hong Kong, Tai Po, N. T. Hong Kong, PR China, E-mail: keithho@ied.edu.hk

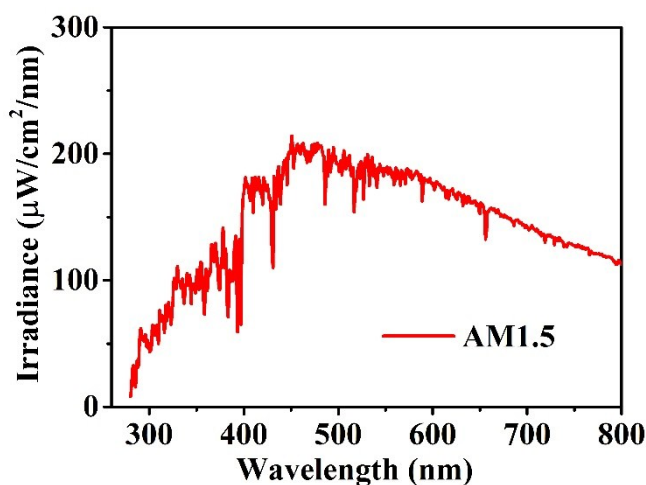

**Fig. S1** Light spectrum of the 350 W Xe lamp

**Table S1** Ni/NiS mass ratio for samples C-ZNNS20, C-ZNNS60 and C-ZNNS120.

|           | Ni<br>(wt%) | S<br>(wt%) | metallic<br>Ni (wt%) | NiS<br>(wt%) | metallic Ni/NiS<br>(wt%:wt%) |
|-----------|-------------|------------|----------------------|--------------|------------------------------|
| C-ZNNS20  | 2.56        | 0.87       | 0.967                | 2.463        | 0.392                        |
| C-ZNNS60  | 3.56        | 1.21       | 1.345                | 3.425        | 0.393                        |
| C-ZNNS120 | 4.99        | 1.69       | 1.893                | 4.787        | 0.395                        |

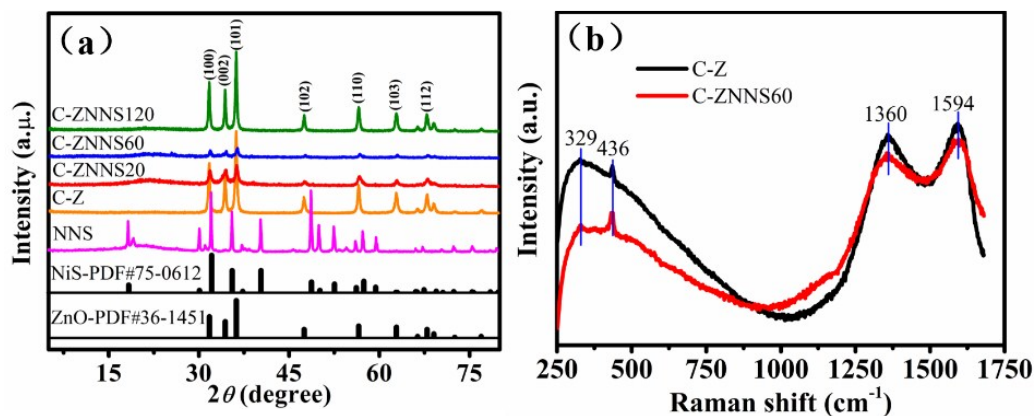

**Fig. S2** (a) XRD patterns of C-Z, NNS, C-ZNNS20, C-ZNNS60 and C-ZNNS120. (b) Raman spectra of C-Z and C-ZNNS60.

Fig. S2(a) shows the XRD patterns of C-Z, NNS, C-ZNNS20, C-ZNNS60 and C-ZNNS120. The XRD pattern of C-Z shows characteristic peaks that could be attributed to wurtzite ZnO (JCPDS No. 36-1451). C-ZNNS20, C-ZNNS60 and C-ZNNS120 showed peaks that were nearly identical to those of pristine C-Z, likely because some peaks of Ni-NiS coincide with those of C-Z ( $31.8^\circ$ ,  $36.3^\circ$ ,  $56.6^\circ$ , and  $69.1^\circ$ ).<sup>1</sup> Moreover, the low content of Ni-NiS renders it virtually undetectable in the XRD pattern of the composite samples. In addition to the low content, the cocatalyst Ni-NiS could also be amorphous.

Raman spectra were used to study the chemical structure of carbon in C-Z and C-ZNNS60 (Fig. S2(b)). Two major peaks at 1360 (D band) and 1594 (G band)  $\text{cm}^{-1}$  were observed in the C-Z spectrum. The relative intensity of the D-band reflects the degree of crystal structure disorder, and that of the G-band represents the first-order scattering the E 2g vibration mode, which is used to characterize the  $\text{sp}^2$  bond structure of carbon. The intensity ratio of ID/IG was 0.95, thereby indicating that the carbon in C-Z is mainly amorphous in nature. The characteristic peaks of ZnO at 329 and 436  $\text{cm}^{-1}$  could be assigned to transverse acoustic overtone scattering and the E2(M) vibration mode, respectively.<sup>2</sup> The peak positions in the Raman spectra of C-ZNNS60 were similar to those of C-Z, but the peak intensities were slightly reduced, thus indicating that loading with Ni-NiS reduces the crystallinity of the materials to some extent.<sup>3</sup> The absence of obvious Ni-NiS peaks confirmed that the content of cocatalyst was low and the Ni-NiS was amorphous, consistent with the previous XRD results.

## References

- [1] C. L. Yu, F. Y. Chen, D. B. Zeng, Y. Xie, W. Q. Zhou, Z. Liu, L. F. Wei, K. Yang and D. H. Li, *Nanoscale*, 2019, **11**, 7720-7733.
- [2] R. Cuscó, E. Alarcón-Lladó, J. Ibáñez, L. Artús, J. Jiménez, B. Wang and M. J. Callahan, *Phys. Rev. B*, 2007, **75**, 165202.
- [3] F. Xu, K. Meng, B. Zhu, H. Liu, J. Xu and J. Yu, *Adv Funct Mater.*, 2019, **29**, 1904256.

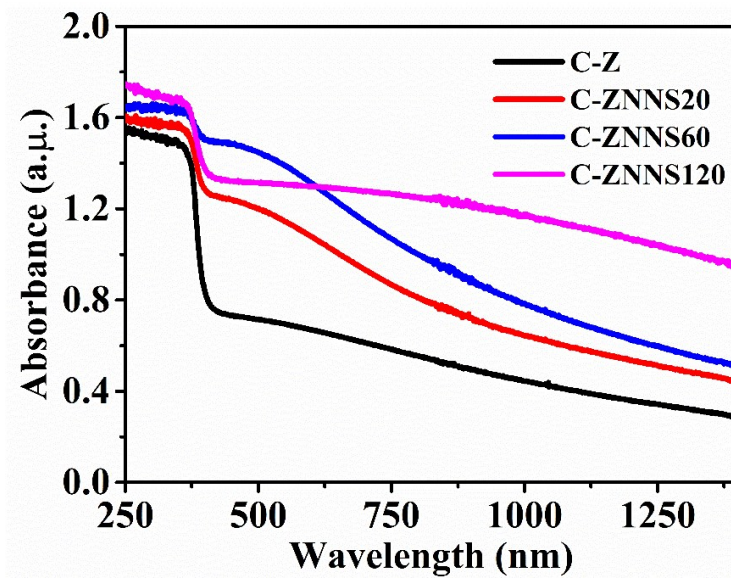

**Fig. S3** UV-vis diffuse reflectance spectra of C-Z, C-ZNNS20, C-ZNNS60 and C-ZNNS120.
